# Supplementary material
Source: publisher figshare collection journal article supplement (https://gsajournals.figshare.com/ndownloader/files/14078111)
Supplement: Supplementary file 1 [file 14078111]

## Sheet: BHA Growth Curve
					Fission Yeast Growth Curves with BHA
			wt 972
			BHA (mM)
		T	0.1	0.15	0.25	0.3	0.4	YES+EtOH	YES Only
		0	500000	500000	500000	500000	500000	500000	500000
		5	2460000	2460000	2140000	2240000	2.34e+06	2320000	Conc. (cell/mL)
		8	Conc. (cell/mL)	2840000	2.34e+06	2120000	2400000	2240000	Conc. (cell/mL)
		24.5	Conc. (cell/mL)	5960000	4940000	3.26e+06	2980000	2300000	Conc. (cell/mL)
					BHA
	Controls	time (hrs)	YES Only	YES+DMSO	0.2 mM	0.4	0.6	0.8	1	2	4
		0	1600000	1560000	1820000	1680000	1720000	1720000	1720000	1840000	0
		5.4	2260000	2480000	2020000	1860000	1860000	1920000	1960000	1940000	0
		7.75	3040000	3180000	2500000	1940000	2020000	1820000	1800000	0	0
		19	11520000	11920000	9520000	3340000	1620000	2020000	1600000	0	0

## Sheet: BHT Growth Curve
								Fission Yeast Growth Curves with BHT
	BHT		Reading	1		2		3		4		5
	wt 972		Time	T = 0	15:00:00	T = 2.5	17:30:00	T = 8.3	23:20:00	T = 24.25	15:15:00	T = 10
			Sample	OD595	Conc. (cell/mL)	OD595	Conc. (cell/mL)	OD595	Conc. (cell/mL)	OD595	Conc. (cell/mL)	OD595	Conc. (cell/mL)
			Control	0.065	1300000	0.082	1.64e+06	0.345	6900000	0.734	14680000
			0.4 mM	0.057	1140000	0.043	860000	0.053	1060000	0.316	6320000		0
			0.6 mM	0.081	1.62e+06	0.07	1.4e+06	0.048	960000	0.16	3200000
			0.8 mM	0.063	1260000	0.069	1.38e+06	0.081	1.62e+06	0.08	1600000
			1.0 mM	0.039	780000	0.05	1e+06	0.058	1160000	0.078	1560000
			2.0 mM	0.042	840000	0.019	380000	0.031	620000	0.082	1.64e+06
		Time	Control	0.4 mM	0.6 mM	0.8 mM	1 mM	2 mM								BHT
		0	1300000	1140000	1.62e+06	1260000	780000	840000				Controls	Time (hrs)	YES Only	YES+DMSO	0.4 mM	0.6	0.8	1	2
		2.5	1.64e+06	860000	1.4e+06	1.38e+06	1e+06	380000					0	1600000	1560000	2360000	2820000	3420000	4080000	6980000
		8.3	6900000	1060000	960000	1.62e+06	1160000	620000					5.4	2260000	2480000	2220000	2560000	2780000	3100000	5240000
		24.25	14680000	6320000	3200000	1600000	1560000	1.64e+06					7.75	3040000	3180000	2240000	2480000	2820000	2880000	4880000
													19	11520000	11920000	5720000	3880000	3240000	2860000	4080000

## Sheet: BPA Growth Curve
					Fission Yeast Growth Curves with BPA
																y = -1E+07x + 1E+07
																			This is the 100% value in cell growth - from the purple plot
															IC	y (cell density)	x (BPA conc.)				12400000	IC	y
															50	6200000	0.38					50	6200000
															60	4960000	0.504					60	4960000
															70	3720000	0.628					70	3720000
															80	2480000	0.752					80	2480000
															90	1240000	0.876					90	1240000
																Time:	3PM	3AM	Difference (Increase in Cell Density)
																Conc (mM)	0	20
																0	640000	1.306e+07	1.242e+07
																0.7	380000	7.78e+06	7.4e+06
																0.75	260000	5860000	5600000
																0.8	320000	2280000	1960000
																0.85	380000	2500000	2120000
																0.9	960000	2240000	1280000
																1	1520000	1900000	380000
1913 made with fresh 120 mM BPA stock													1913 made with fresh 120 mM BPA stock
													Conc (mM)
	2010-06-09			2010-06-10					2010-06-11					2010-06-09			2010-06-10					2010-06-11
Time:	3PM	7PM	11PM	3AM	11AM	3PM	7PM	9PM	12AM	3AM			Time:	3PM	7PM	11PM	3AM	11AM	3PM	7PM	9PM	12AM	3AM
Timepoint (hrs):	0	4	8	12	20	24	28	30	33	36			Timepoint (hrs):	Cell Densities (cell/mL)
Conc (mM)	Absorbance Readings													0	4	8	12	20	24	28	30	33	36
0	0.032	0.164	0.469	0.686	0.653	0.748	0.791			0.777			0	640000	3.28e+06	9380000	1.372e+07	1.306e+07	14960000	1.582e+07			1.554e+07
0.7	0.019	0.036	0.043	0.097	0.389	0.643	0.724			0.697			0.7	380000	720000	860000	1.94e+06	7.78e+06	12860000	14480000			13940000
0.75	0.013	0.044	0.092	0.052	0.293	0.48	0.629			0.721			0.75	260000	880000	1840000	1040000	5860000	9600000	12580000			14420000
0.8	0.016	0.073	0.037	0.043	0.114	0.259		0.583		0.504			0.8	320000	1460000	740000	860000	2280000	5180000		11660000		10080000
0.85	0.019	0.045	0.037	0.038	0.125	0.242	0.402	0.506	0.673	0.749			0.85	380000	900000	740000	760000	2500000	4840000	8.04e+06	10120000	1.346e+07	14980000
0.9	0.048	0.04	0.048	0.075	0.112	0.098	0.159	0.216	0.348	0.601			0.9	960000	800000	960000	1500000	2240000	1.96e+06	3180000	4320000	6960000	12020000
1	0.076	0.035	0.08	0.032	0.095	0.046	0.053	0.052	0.075	0.106			1	1520000	700000	1600000	640000	1900000	920000	1060000	1040000	1500000	2120000
1913 made with week-old 100 mM BPA stock													1913 made with week-old 100 mM BPA stock
													Conc (mM)
	2010-06-09			2010-06-10				2010-06-11						2010-06-09			2010-06-10				2010-06-11
Time:	3PM	7PM	11PM	3AM	11AM	3PM	9PM	3AM					Time:	3PM	7PM	11PM	3AM	11AM	3PM	9PM	3AM
Timepoint (hrs):	0	4	8	12	20	24	30	36					Timepoint (hrs):	Cell Densities (cell/mL)
Conc (mM)	Absorbance Readings													0	4	8	12	20	24	30	36
0	0.028	0.13	0.268	0.566	0.686	0.643	0.878	0.691					0	560000	2600000	5.36e+06	11320000	1.372e+07	12860000	17560000	13820000
0.7	0.018	0.048	0.096	0.268	0.631	0.767	0.769	0.75					0.7	360000	960000	1.92e+06	5.36e+06	12620000	1.534e+07	1.538e+07	15000000
0.75	0.019	0.028	0.099	0.128	0.639	0.691	0.782	0.7					0.75	380000	560000	1.98e+06	2560000	12780000	13820000	1.564e+07	14000000
0.8	0.015	0.023	0.013	0.017	0.008	0.067	0.003	0.173					0.8	300000	460000	260000	340000	160000	1.34e+06	60000	3460000
0.85	0.031	0.039	0.052	0.063	0.438	0.651	0.731	0.809					0.85	620000	780000	1040000	1260000	8760000	1.302e+07	14620000	1.618e+07
0.9	0.036	0.044	0.038	0.051	0.271	0.52	0.709	0.458					0.9	720000	880000	760000	1020000	5.42e+06	10400000	14180000	9160000
1	0.043	0.061	0.035	0.032	0.108	0.133	0.403	0.708					1	860000	1220000	700000	640000	2160000	2.66e+06	8.06e+06	14160000
														Conc (mM)
1913 made with fresh 120 mM BPA stock													1913 made with fresh 120 mM BPA stock
		2010-06-10		2010-06-11											2010-06-10		2010-06-11
	Time:	7PM	9PM	12AM	3AM									Time:	3PM	7PM	9PM	12AM	3AM
	Timepoint (hrs):	28	30	33	36									Timepoint (hrs):	Cell Densities (cell/mL)
	Conc (mM)	Absorbance Readings													24	28	30	33	36
	0.8 new		0.367		0.596									0.8 new	5180000		7340000		11920000
	0.85 new	0.309	0.318	0.309	0.289									0.85 new	4840000	6180000	6360000	6180000	5780000
	0.9 new	0.144	0.145	0.128	0.134									0.9 new	1960000	2880000	2900000	2560000	2.68e+06
	1new	0.056	0.056	0.115	0.06									1new	920000	1120000	1120000	2300000	1200000
	new media ones all used day-old BPA stock													new media ones all used day-old BPA stock
														Conc (mM)
1913 made with week-old 100mM BPA Stock													1913 made with week-old 100mM BPA Stock
		2010-06-10	2010-06-11												2010-06-10	2010-06-11
	Time:	9PM	3AM											Time:	3PM	9PM	3AM
	Timepoint (hrs):	30	36											Timepoint (hrs):	Cell Densities (cell/mL)
	Conc (mM)	Absorbance Readings													24	30	36
	0.85 new	0.744	0.812											0.85 new	1.302e+07	14880000	1.624e+07
	0.9 new	0.693	0.74											0.9 new	10400000	13860000	14800000
	1.0 new	0.182	0.182											1.0 new	2660000	3640000	3640000
	new media ones- 0.85 and 1.0 used day-old BPA stock and 0.9 used week-old BPA stock													new media ones- 0.85 and 1.0 used day-old BPA stock and 0.9 used week-old BPA stock

## Sheet: IC Values
	IC Values	BHA	BHT	BPA
	IC50 (mM)	0.3	0.4	0.38
	IC70 (mM)	0.4	0.6	0.63
	IC80 (mM)	0.5	0.8	0.75
